# Supplementary material for: Long non-coding RNA EWSAT1 promotes human nasopharyngeal carcinoma cell growth in vitro by targeting miR-326/-330-5p
Source: PubMed Central journal article supplement (PMC5182074; doi:10.18632/aging.101103), 2016-11-03
Supplement: aging-08-2948-s001.pdf [file aging-08-2948-s001.pdf]

**SUPPLEMENTARY MATERIAL**

**Table S1. Predicted results using miRDB (target score≥50)**

| Target Detail | Target Rank | Target Score | miRNA Name      | Gene Symbol |
|---------------|-------------|--------------|-----------------|-------------|
|               | 1           | 92           | hsa-miR-4296    | submission  |
|               | 2           | 87           | hsa-miR-4291    | submission  |
|               | 3           | 81           | hsa-miR-3168    | submission  |
|               | 4           | 79           | hsa-miR-5004-5p | submission  |
|               | 5           | 78           | hsa-miR-1224-5p | submission  |
|               | 6           | 76           | hsa-miR-4322    | submission  |
|               | 7           | 76           | hsa-miR-4265    | submission  |
|               | 8           | 76           | hsa-miR-3713    | submission  |
|               | 9           | 75           | hsa-miR-4516    | submission  |
|               | 10          | 71           | hsa-miR-497-3p  | submission  |
|               | 11          | 69           | hsa-miR-27a-5p  | submission  |
|               | 12          | 69           | hsa-miR-3192-5p | submission  |
|               | 13          | 69           | hsa-miR-6825-5p | submission  |
|               | 14          | 66           | hsa-miR-8065    | submission  |
|               | 15          | 65           | hsa-miR-4793-5p | submission  |
|               | 16          | 64           | hsa-miR-6875-5p | submission  |
|               | 17          | 64           | hsa-miR-3126-5p | submission  |
|               | 18          | 64           | hsa-miR-4534    | submission  |
|               | 19          | 62           | hsa-miR-4459    | submission  |
|               | 20          | 61           | hsa-miR-4316    | submission  |
|               | 21          | 60           | hsa-miR-922     | submission  |
|               | 22          | 60           | hsa-miR-6891-5p | submission  |
|               | 23          | 58           | hsa-miR-330-5p  | submission  |
|               | 24          | 58           | hsa-miR-326     | submission  |
|               | 25          | 57           | hsa-miR-4426    | submission  |
|               | 26          | 56           | hsa-miR-5195-3p | submission  |
|               | 27          | 55           | hsa-miR-4293    | submission  |
|               | 28          | 55           | hsa-miR-6868-5p | submission  |
|               | 29          | 55           | hsa-miR-1296-3p | submission  |
|               | 30          | 54           | hsa-miR-3187-3p | submission  |
|               | 31          | 54           | hsa-miR-4779    | submission  |
|               | 32          | 53           | hsa-miR-581     | submission  |
|               | 33          | 53           | hsa-miR-4685-3p | submission  |
|               | 34          | 53           | hsa-miR-4287    | submission  |
|               | 35          | 52           | hsa-miR-3120-3p | submission  |
|               | 36          | 51           | hsa-miR-6765-3p | submission  |
|               | 37          | 50           | hsa-miR-4802-5p | submission  |
|               | 38          | 50           | hsa-miR-4483    | submission  |

Please browse the Full Text version of this manuscript to see **Table S2. Predicted results using PITA (target score≤-20).**
